# Supplementary material for: The difference between two brachycephalic and one mesocephalic dog breeds' problem-solving performance suggests evidence for paedomorphism in behaviour
Source: Research Square preprint supplement (doi:10.21203/rs.3.rs-2567976/v1), 2023-02-23
Supplement: Supplementary file 1 [file edff2e6260d6f480ce682a3f.xlsx]

## Sheet: AllData
	English Bulldog EB
BOX A		Proportion of total time					Sec
	Name	OrientOwner	OrientExp	OrientBox	PawUse	NoseUse	OpenLat
1.	Bowling	36.5	16.83	13.83	0	9	120
2.	Archibald	0	5.88	94.12	0	94.12	3.4
3.	Shiva	23.03	33.28	11.93	1.18	9.58	120
4.	Bosco	21.75	25.99	20.42	0	18.3	75.4
5.	Rocco	17.11	17.29	1.5	0	0.94	120
6.	Hektor	6.24	23.02	18.94	0	18.23	83.4
7.	Jack	16.64	38.03	3.9	0	1.36	120
8.	Fotel	16.55	15.7	5.29	0	3.75	120
9.	Lamantin	7.83	40	37.83	0	29.67	120
10.	Brisz	0	0	100	0	100	2
11.	Dagi	31.13	0	60.93	0	59.6	30.2
12.	Wellington	18.46	33.85	47.69	0	33.85	13
13.	Gyömösz	0	20	80	0	60	3
14.	Fióna	22.83	45.17	18.17	0.83	16.67	120
15.	Szamóca	0	35.71	64.29	0	45.24	16.8
BOX B		Proportion of total time					Sec
	Name	OrientOwner	OrientExp	OrientBox	PawUse	NoseUse	OpenLat
1.	Bowling	10.08	11.14	45.89	1.06	37.67	75.4
2.	Archibald	13.67	15.83	56.33	0	52.67	120
3.	Shiva	15.64	16.2	55.87	0	40.22	35.8
4.	Bosco	12.78	15.04	25.56	3.76	15.79	26.6
5.	Rocco	26.84	15.04	37.46	0	35.99	67.8
6.	Hektor	0	0	100	0	76.92	2.6
7.	Jack	21.85	15.97	22.69	2.52	21.01	23.8
8.	Fotel	7.91	31.07	24.11	1.13	22.03	120
9.	Lamantin	4.17	45.33	8.33	0	4.83	120
10.	Brisz	0.65	14.98	71.01	3.91	65.47	61.4
11.	Dagi	17.11	18.77	21.1	2.33	14.29	120
12.	Wellington	6.8	44.9	11.81	0	7.51	120
13.	Gyömösz	32.6	20.71	30.05	3.23	20.2	120
14.	Fióna	13.33	25.67	44	0.67	43	120
15.	Szamóca	8.8	24.72	58.99	0	56.55	106.8
BOX C		Proportion of total time					Sec
	Name	OrientOwner	OrientExp	OrientBox	PawUse	NoseUse	OpenLat
1.	Bowling	0	5.17	94.83	24.14	43.1	11.6
2.	Archibald	0	0	100	0	92.31	2.6
3.	Shiva	0	0	100	0	100	1.2
4.	Bosco	0	0	64.71	0	35.29	3.4
5.	Rocco	14.07	19.93	6.53	0	5.03	120
6.	Hektor	0	36.36	63.64	0	63.64	2.2
7.	Jack	12.42	43.21	1.99	0	1.99	120
8.	Fotel	0	38.89	61.11	0	47.22	7.2
9.	Lamantin	0	43.51	39.69	0	34.35	52.4
10.	Brisz	0	0	100	0	92.59	5.4
11.	Dagi	0	0	100	0	100	2.8
12.	Wellington	0	50	50	0	43.48	9.2
13.	Gyömösz	0	3.85	96.15	11.54	61.54	5.2
14.	Fióna	0	32.84	55.22	0	25.37	13.4
15.	Szamóca	0	0	100	0	100	2
	French Bulldog FB
BOX A		Proportion of total time					Sec
	Name	OrientOwner	OrientExp	OrientBox	PawUse	NoseUse	OpenLat
1.	Joey	24.16	29.78	41.57	0	41.01	35.6
2.	Lola	18.2	29.46	23.05	0	19.41	120
3.	Luna	7.89	28.99	44.6	0	39.11	120
4.	Buffy	2.19	34.31	59.12	0	56.93	27.4
5.	Ottó	0	0	100	0	100	3
6.	Pepe	11.6	35.15	14.24	0	10.37	120
7.	Molly	5.63	19.8	46.08	2.56	42.49	120
8.	Lunaa	30.12	0	57.83	0	54.22	16.6
9.	Zoé	15.33	28.22	28.44	0	26.44	90
10.	Mása	11.18	22.37	61.84	0	60.53	30.4
11.	Villám	0	0	100	0	100	9.4
12.	Gabriella	5.8	16.67	13.77	0	10.87	120
13.	Szandi	0	0	94.12	11.76	80	17
14.	Dior	0	0	100	0	100	5.2
15.	Jade	5.99	45.21	39.82	8.38	29.64	66.8
BOX B		Proportion of total time					Sec
	Name	OrientOwner	OrientExp	OrientBox	PawUse	NoseUse	OpenLat
1.	Joey	18.33	39.5	35.5	1	33.83	120
2.	Lola	36.09	11.13	31.53	0	30.19	120
3.	Luna	10.98	38.51	21.28	0	13.85	120
4.	Buffy	15.66	27.44	39.9	0	38.72	120
5.	Ottó	8.14	13.29	4.65	0	4.15	120
6.	Pepe	8.76	23.88	9.45	0	8.42	120
7.	Molly	0	0	100	0	95.74	9.4
8.	Lunaa	22	27.17	3.17	0	2.67	120
9.	Zoé	16.41	18.97	26.5	0	25.47	120
10.	Mása	12.17	37.74	46.56	3.35	41.45	120
11.	Villám	1.61	10.14	46.59	5.73	40.32	120
12.	Gabriella	6.77	41.04	26.69	0	23.51	50.2
13.	Szandi	11.98	0	77.84	4.79	66.47	33.4
14.	Dior	0	20.67	50.67	7.33	41.5	120
15.	Jade	0	11.76	85.88	0	81.18	34
BOX C		Proportion of total time					Sec
	Name	OrientOwner	OrientExp	OrientBox	PawUse	NoseUse	OpenLat
1.	Joey	25.49	53.43	14.22	0	12.25	40.8
2.	Lola	29.81	41.35	15.38	0	4.81	20.8
3.	Luna	23.26	2.33	65.12	0	46.51	8.6
4.	Buffy	0	29.23	58.46	0	53.85	13
5.	Ottó	0	0	100	0	100	9.6
6.	Pepe	0	11.11	88.89	0	88.89	3.6
7.	Molly	0	0	100	0	75	0.8
8.	Lunaa	0	0	100	0	100	0.4
9.	Zoé	22.17	9.91	10.85	0	10.38	42.4
10.	Mása	8	51.76	25.65	0	25.18	85
11.	Villám	0	47.22	41.67	0	30.56	14.4
12.	Gabriella	0	47.62	38.1	0	28.57	8.4
13.	Szandi	4.65	20.93	60.47	0	55.81	17.2
14.	Dior	0	2.23	88.85	0	86.99	53.8
15.	Jade	0	11.11	88.89	0	88.89	1.8
	Mudi M
BOX A		Proportion of total time					Sec
	Name	OrientOwner	OrientExp	OrientBox	PawUse	NoseUse	OpenLat
1.	Fruti	7.26	7.66	35.89	10.08	0	49.4
2.	Bojtár	0	0	79.41	0	44.12	6.6
3.	Kedves	0	33.17	30.15	0	17.59	39.6
4.	Lepke	0	0	85.71	0	28.57	1.2
5.	Pletyka	0	0	96	0	76	4.8
6.	Csinos	20.48	28.06	15.16	2.74	6.29	120
7.	Tipli	0	0	97.37	84.21	10.53	7.4
8.	Villám	0	5.65	74.19	0	34.68	24.6
9.	Ágas	0	10	90	15	65	3.8
10.	Akác	8.45	14.59	26.3	0	13.63	120
11.	Alfie	0	0	100	0	66.67	6.4
12.	Bikfic	0	4.55	95.45	63.64	0	37.8
13.	Bodor	0	0	100	12	68	4.8
14.	Ében	0	0	100	21.43	64.29	2.6
15.	Csele	4.95	3.3	53.47	16.5	31.68	60.4
BOX B		Proportion of total time					Sec
	Name	OrientOwner	OrientExp	OrientBox	PawUse	NoseUse	OpenLat
1.	Fruti	0	0	98.82	0	92.94	16.8
2.	Bojtár	0	0	91.67	0	71.88	19
3.	Kedves	0	0	97.67	14.73	82.95	25.6
4.	Lepke	0	7.24	66.21	2.41	37.93	57.8
5.	Pletyka	0	0	89.91	68.81	20.64	43.4
6.	Csinos	0	0	100	18.75	75	9.4
7.	Tipli	0	0	76.3	31.21	52.6	34.4
8.	Villám	0	0	100	69.57	0	4.4
9.	Ágas	0	5.63	65.8	12.99	45.89	46
10.	Akác	14.94	6.33	31.17	22.73	0.49	120
11.	Alfie	0	0	100	82.54	0	12.4
12.	Bikfic	2.63	0	48.95	1.58	23.16	4.2
13.	Bodor	0	0	100	83.33	18.75	9.4
14.	Ében	0	6.52	45.65	2.9	31.88	27.4
15.	Csele	0	0	100	14.71	73.53	6.6
BOX C		Proportion of total time					Sec
	Name	OrientOwner	OrientExp	OrientBox	PawUse	NoseUse	OpenLat
1.	Fruti	0	0	100	0	50	2.2
2.	Bojtár	4.32	3.78	57.84	1.62	32.43	36.8
3.	Kedves	0	0	100	75	8.33	2.2
4.	Lepke	0	0	94.12	47.06	5.88	3.2
5.	Pletyka	0	0	85.25	0	59.02	24.2
6.	Csinos	0	10.83	71.67	0	55.83	23.8
7.	Tipli	0	0	93.33	0	40	2.8
8.	Villám	0	0	75	0	25	1.4
9.	Ágas	0	7.14	85.71	42.86	0	2.6
10.	Akác	22.36	12.66	25.74	0	9.28	47.2
11.	Alfie	0	0	100	0	52.38	4
12.	Bikfic	18.52	19.75	24.69	0	12.35	32.2
13.	Bodor	0	8.45	50.7	0	33.8	14
14.	Ében	0	0	100	31.58	47.37	3.6
15.	Csele	0	0	93.33	0	63.33	5.8
